# Supplementary material for: Structural Basis for a Safety-Belt Mechanism That Anchors Condensin to Chromosomes
Source: PubMed Central journal article supplement (PMC5651216; doi:10.1016/j.cell.2017.09.008), 2017-10-19
Supplement: mmc1.pdf [file mmc1.pdf]

**Cell, Volume 171**

**Supplemental Information**

**Structural Basis for a Safety-Belt Mechanism**

**That Anchors Condensin to Chromosomes**

**Marc Kschonsak, Fabian Merkel, Shveta Bisht, Jutta Metz, Vladimir Rybin, Markus Hassler, and Christian H. Haering**

|                        |                                                     | <i>S. pombe</i><br>Cnd3–Cnd2<br>(SeMet-SAD)*   | <i>S. pombe</i><br>Cnd3–Cnd2<br>(native)**     | <i>S. cerevisiae</i><br>Ycg1–Brn1 | <i>S. cerevisiae</i><br>Ycg1–Brn1<br>with DNA (I) | <i>S. cerevisiae</i><br>Ycg1–Brn1<br>with DNA (II) | <i>S. cerevisiae</i><br>Ycg1–Brn1 <sub>short</sub><br>kleisin loop with DNA |
|------------------------|-----------------------------------------------------|------------------------------------------------|------------------------------------------------|-----------------------------------|---------------------------------------------------|----------------------------------------------------|-----------------------------------------------------------------------------|
| <b>Data collection</b> | Space group                                         | P 2 <sub>1</sub> 2 <sub>1</sub> 2 <sub>1</sub> | P 2 <sub>1</sub> 2 <sub>1</sub> 2 <sub>1</sub> | P 3 <sub>1</sub> 2 1              | P 2 <sub>1</sub> 2 <sub>1</sub> 2 <sub>1</sub>    | P 2 <sub>1</sub> 2 <sub>1</sub> 2 <sub>1</sub>     | P 2 <sub>1</sub> 2 <sub>1</sub> 2 <sub>1</sub>                              |
|                        | Molecules/asu                                       | 2                                              | 2                                              | 2                                 | 1                                                 | 1                                                  | 1                                                                           |
|                        | Cell dimensions (Å)                                 |                                                |                                                |                                   |                                                   |                                                    |                                                                             |
|                        | <i>a</i>                                            | 89.21                                          | 88.41                                          | 185.53                            | 80.14                                             | 88.80                                              | 89.15                                                                       |
|                        | <i>b</i>                                            | 141.76                                         | 142.11                                         | 185.53                            | 114.83                                            | 117.94                                             | 116.22                                                                      |
|                        | <i>c</i>                                            | 177.01                                         | 176.92                                         | 148.32                            | 155.21                                            | 154.97                                             | 155.52                                                                      |
|                        | Resolution (Å)                                      | 49.21-3.50<br>(3.71-3.50)                      | 49.06-2.61<br>(2.67-2.61)                      | 49.44-2.79<br>(2.94-2.79)         | 47.17-2.98<br>(3.14-2.98)                         | 49.21-3.25<br>(3.43-3.25)                          | 48.68-3.15<br>(3.32-3.15)                                                   |
|                        | <i>R</i> <sub>merge</sub>                           | 0.762<br>(5.147)                               | 0.211<br>(1.482)                               | 0.139<br>(1.745)                  | 0.202<br>(1.416)                                  | 0.271<br>(1.854)                                   | 0.198<br>(1.115)                                                            |
|                        | <i>I</i> / $\sigma$ <i>I</i>                        | 13.6<br>(4.3)                                  | 11.2<br>(1.8)                                  | 12.9<br>(1.3)                     | 8.5<br>(1.4)                                      | 6.7<br>(1.1)                                       | 8.4<br>(1.9)                                                                |
|                        | CC(1/2)                                             | 0.998<br>(0.907)                               | 0.993<br>(0.678)                               | 0.999<br>(0.444)                  | 0.995<br>(0.565)                                  | 0.995<br>(0.513)                                   | 0.999<br>(0.287)                                                            |
| Completeness (%)       | 99.9<br>(99.8)                                      | 100.0<br>(100.0)                               | 100.0<br>(100.0)                               | 100.0<br>(100.0)                  | 100.0<br>(100.0)                                  | 100.0<br>(100.0)                                   |                                                                             |
| Redundancy             | 51.1<br>(48.0)                                      | 13.4<br>(13.0)                                 | 10.2<br>(10.4)                                 | 6.7<br>(7.1)                      | 6.7<br>(6.8)                                      | 12.3<br>(8.6)                                      |                                                                             |
| <b>Refinement</b>      | Resolution (Å)                                      |                                                | 49.06-2.61                                     | 47.25-2.79                        | 47.17-2.98                                        | 47.32-3.25                                         | 47.34-3.15                                                                  |
|                        | No. reflections (total)                             |                                                | 68,083                                         | 73,424                            | 29,952                                            | 26,286                                             | 28,612                                                                      |
|                        | <i>R</i> <sub>work</sub> / <i>R</i> <sub>free</sub> |                                                | 0.22/0.26                                      | 0.20/0.25                         | 0.22/0.26                                         | 0.24/0.27                                          | 0.25/0.28                                                                   |
|                        | No. atoms                                           |                                                |                                                |                                   |                                                   |                                                    |                                                                             |
|                        | Protein                                             |                                                | 12,985                                         | 14,377                            | 7,317                                             | 7,420                                              | 7,380                                                                       |
|                        | Ligand/ion                                          |                                                | 0                                              | 0                                 | 753                                               | 768                                                | 732                                                                         |
|                        | Water                                               |                                                | 47                                             | 32                                | 0                                                 | 0                                                  | 0                                                                           |
| <i>B</i> -factors      |                                                     |                                                |                                                |                                   |                                                   |                                                    |                                                                             |
| Protein                |                                                     | 75.31                                          | 80.71                                          | 62.87                             | 85.51                                             | 67.28                                              |                                                                             |
| Ligand/ion             |                                                     | n.a.                                           | n.a.                                           | 124.38                            | 126.86                                            | 109.04                                             |                                                                             |
| Water                  |                                                     | 50.96                                          | 80.04                                          | n.a.                              | n.a.                                              | n.a.                                               |                                                                             |
| R.m.s deviations       |                                                     |                                                |                                                |                                   |                                                   |                                                    |                                                                             |
| Bond lengths (Å)       |                                                     | 0.003                                          | 0.003                                          | 0.003                             | 0.003                                             | 0.003                                              |                                                                             |
| Bond angles (°)        |                                                     | 0.568                                          | 0.527                                          | 0.552                             | 0.513                                             | 0.571                                              |                                                                             |

**Table S1. Data collection and refinement statistics, related to Figures 2, 4 and 5.**

Values in parentheses are for the highest-resolution shell, \*from 4 merged datasets, \*\*from 2 merged datasets.

|          |                    |                            | $\gamma$ -kleisin                 | $\beta$ -kleisin | HEAT           |            |
|----------|--------------------|----------------------------|-----------------------------------|------------------|----------------|------------|
| Fungi    | Ascomycetes        | Saccharomycetes            | <i>Saccharomyces cerevisiae</i>   | P38170           | –              | Q06680     |
|          |                    |                            | <i>Kluyveromyces lactis</i>       | Q6CP87           | –              | Q6CQY6     |
|          |                    | Sordariomycetes            | <i>Chaetomium thermophilum</i>    | G0SBJ6           | –              | G0SHK2     |
|          |                    | Leotiomycetes              | <i>Sclerotinia sclerotiorum</i>   | A7F567           | –              | A7EQU0     |
|          |                    | Eurotiomycetes             | <i>Emericella nidulans</i>        | Q5B5B5           | –              | Q5AUH4     |
|          |                    | Dothideomycetes            | <i>Phaeosphaeria nodorum</i>      | Q0UXS3           | –              | Q0TYJ2     |
|          |                    | Pezizomycetes              | <i>Tuber melanosporum</i>         | D5GHC6           | –              | D5G3W5     |
|          |                    | Schizosaccharomycetes      | <i>Schizosaccharomyces pombe</i>  | Q9Y7R3           | –              | Q10429     |
|          | Basidiomycetes     |                            | <i>Moniliophthora roreri</i>      | V2XXX7           | –              | V2YA02     |
|          | Microsporidians    |                            | <i>Encephalitozoon cuniculi</i>   | Q8SWA2           | –              | M1JI11     |
| Animals  | Vertebrates        | Mammals                    | <i>Homo sapiens</i>               | Q15003           | Q6IBW4         | Q9BPX3     |
|          |                    |                            | <i>Mus musculus</i>               | Q8C156           | Q8BSP2         | E9PWG6     |
|          |                    | Birds                      | <i>Gallus gallus</i>              | A0A1D5P3B2       | XP004937454.2* | E1C181     |
|          |                    | Reptiles                   | <i>Alligator mississippiensis</i> | A0A151MMA8       | A0A151PFS9     | A0A151P9P6 |
|          |                    | Amphibians                 | <i>Xenopus laevis</i>             | O13067           | Q641G4         | Q9YHB5     |
|          |                    | Fish                       | <i>Danio rerio</i>                | A1L231           | Q5RH01         | F1QJY8     |
|          | Cartilaginous fish | <i>Callorhynchus milii</i> | V9KIM3                            | V9KKJ5           | V9KCC1         |            |
|          | Arthropods         | Insects                    | <i>Apis mellifera</i>             | A0A088AUC1       | A0A088A774     | A0A087ZT91 |
|          |                    | Crustaceans                | <i>Daphnia pulex</i>              | E9GU42           | E9GRW6         | E9HM85     |
|          | Mollusks           |                            | <i>Octopus bimaculoides</i>       | A0A0L8HZ58       | A0A0L8FUD0     | A0A0L8HTM5 |
| Plants   | Eudicots           | Mustard family             | <i>Arabidopsis thaliana</i>       | Q564K3           | Q9LUR0         | Q0WVX3     |
|          |                    | Mallow family              | <i>Theobroma cacao</i>            | A0A061FCQ2       | A0A061EP02     | A0A061EDQ5 |
|          |                    | Pea family                 | <i>Glycine max</i>                | I1KFG2           | I1L0X2         | I1MZF2     |
|          |                    | Willow family              | <i>Populus trichocarpa</i>        | B9IAH8           | B9HXR3         | B9H3B9     |
|          |                    | Grape family               | <i>Vitis vinifera</i>             | D7TEB5           | F6H6W0         | D7U7E6     |
|          |                    | Nightshade family          | <i>Solanum lycopersicum</i>       | K4CF69           | K4DHW3         | K4D5U2     |
|          |                    | Amaranth family            | <i>Beta vulgaris</i>              | A0A0J8FA76       | A0A0J8BC64     | A0A0J8CTW9 |
|          | Monocots           | Grass family               | <i>Zea mays</i>                   | B6U4T0           | B6U1S5         | K7W7V3     |
|          | Magnoliophyta      | Amborella family           | <i>Amborella trichopoda</i>       | W1NZC1           | W1P0G4         | W1NKW2     |
|          | Red algae          |                            | <i>Cyanidioschyzon merolae</i>    | M1V4K2           | M1VH11         | M1VHT1     |
| Protists | Choanoflagellates  |                            | <i>Monosiga brevicollis</i>       | A9V7D8           | A9V3Q2         | A9UTE1     |
|          | Amoebozoa          | Dictyostelium              | <i>Dictyostelium discoideum</i>   | Q54DR4           | Q54DZ9         | Q54TZ8     |
|          | Stramenopiles      | Diatoms                    | <i>Phaeodactylum tricorutum</i>   | B7G0X0           | B7GDJ8         | B7G8V9     |
|          |                    | Oomycetes                  | <i>Saprolegnia parasitica</i>     | A0A067CV32       | A0A067CAZ5     | A0A067BMH9 |
|          | Cryptomonads       |                            | <i>Guillardia theta</i>           | L1INS6           | L1I8P6         | L1IG07     |

**Table S2. Protein sequences used for sequence alignments, related to Figures 3B, 6A and S3.**

Table lists Uniprot or \*seq-ref identifiers.
